1 **Different B cell subpopulations show distinct patterns in their IgH repertoire metrics**

2

3 Marie Ghraichy<sup>1</sup>, Valentin von Niederhäusern<sup>1</sup>, Aleksandr Kovaltsuk<sup>2</sup>, Jacob D. Galson<sup>1,3</sup>,  
4 Charlotte M. Deane<sup>2</sup>, Johannes Trück<sup>1</sup>

5

6 <sup>1</sup> *Division of Immunology, University Children's Hospital and Children's Research Center,*  
7 *University of Zurich (UZH), Switzerland*

8 <sup>2</sup> *Department of Statistics, University of Oxford, United Kingdom*

9 <sup>3</sup> *Alchemab Therapeutics Ltd, London, United Kingdom*

10

11 **Abstract**

12 *Background:*

13 Several human B-cell subpopulations are recognized in the peripheral blood, which play  
14 distinct roles in the humoral immune response. These cells undergo developmental and  
15 maturational changes involving VDJ recombination, somatic hypermutation and class switch  
16 recombination, altogether shaping their immunoglobulin heavy chain (IgH) repertoire.

17 *Methods:*

18 Here, we sequenced the IgH repertoire of naïve, marginal zone, switched and plasma cells  
19 from 10 healthy adults along with matched unsorted and *in silico* separated CD19<sup>+</sup> bulk B  
20 cells. We used advanced bioinformatic analysis and machine learning to thoroughly examine  
21 and compare these repertoires.

22 *Results:*

23 We show that sorted B cell subpopulations are characterised by distinct repertoire  
24 characteristics on both the individual sequence and the repertoire level. Sorted subpopulations  
25 shared similar repertoire characteristics with their corresponding *in silico* separated subsets.  
26 Furthermore, certain IgH repertoire characteristics correlated with the position of the constant  
27 region on the IgH locus.

28 *Conclusion:*

29 Overall, this study provides unprecedented insight over mechanisms of B cell repertoire  
30 control in peripherally circulating B cell subpopulations.

## 31 Introduction

32 B-cell development starts in the bone marrow where immature B cells must assemble and  
33 express on their surface a functional but non-self-reactive B cell antigen receptor (BCR).<sup>1</sup> The  
34 generation of the heavy and light chain of the BCR is mediated by the random and imprecise  
35 process of V(D)J recombination.<sup>2</sup> Further development of B cells occurs in the periphery in  
36 response to stimulation with the process of somatic hypermutation (SHM) through which point  
37 mutations are introduced in the genes coding for the V(D)J part of the immunoglobulin heavy  
38 (IgH) and light chain.<sup>3</sup> Subsequently, B cells with a mutated BCR providing increased antigen  
39 affinity are selected and show increased survival and proliferation capacity.<sup>4</sup>

40  
41 Furthermore, class-switch recombination (CSR) modifies the IgH constant region resulting in  
42 the generation of B cells with nine different immunoglobulin isotypes or isotype subclasses,  
43 namely IgD, IgM, IgG1-4, IgA1/2 and IgE.<sup>5</sup> This process involves the replacement of the  
44 proximal heavy chain constant gene by a more distal gene. Class switching is an essential  
45 mechanism during humoral immune responses as the constant region of an antibody determines  
46 its effector function.<sup>6</sup> Both direct switching and sequential switching upon a second round of  
47 antigen exposure have been reported.<sup>7-9</sup>

48  
49 Through developmental mechanisms and further differentiation in the periphery, several  
50 phenotypically distinct circulating B cell subpopulations are generated.<sup>10</sup> They include naïve,  
51 marginal zone (MZ), switched memory B cells and plasma cells (PC), which are mainly  
52 characterized by their differential expression of surface markers and by playing distinct roles  
53 in the adaptive immune response.<sup>11</sup> High-throughput sequencing of the IgH repertoire (AIRR-  
54 seq) has made it possible to improve our understanding of the different components of the  
55 adaptive immune system in health and disease, and following vaccine challenge.<sup>12-16</sup> Previous  
56 studies using both high- and low-throughput sequencing techniques have already reported  
57 important differences between B-cell subpopulations affecting their IgH repertoire  
58 composition, VDJ gene usage, mutations and clonality.<sup>17-20</sup>

59  
60 Recent AIRR-seq workflows allow coverage of a sufficient part of the IgH constant region in  
61 addition to the VDJ region, making it possible to assign antibody classes and subclasses on an  
62 individual sequence level. It is common practice to use unsorted bulk B cells from peripheral  
63 blood as a starting material and use the constant region information combined with the degree  
64 of SHM to group transcripts *in silico* into different B cell populations.<sup>21,22</sup> Using isotype-  
65 resolved IgH sequencing of bulk B cells, isotype subclasses have been found to show  
66 differences in their repertoire characteristics.<sup>23,24</sup> However, it remains unknown how the IgH  
67 repertoire of bioinformatically separated transcripts originating from bulk-sequenced B cells  
68 compares to the repertoire of their corresponding circulating B cell subpopulations. It is also  
69 unknown how IgH sequences with the same constant region originating from different cell types  
70 compare.

71  
72 Here, we used an established AIRR-seq workflow that captures the diversity of the variable IgH  
73 genes together with the isotype subclass usage to study in detail the repertoire of CD19<sup>+</sup> bulk  
74 B cells as well as flow cytometry sorted naïve, MZ, switched and plasma cells from 10 healthy  
75 adults. We applied advanced statistical methods and machine learning algorithms to combine  
76 several repertoire metrics and characterize the different B cell subpopulations. We show that  
77 transcripts from physically sorted B cell subpopulations share similar characteristics with their  
78 corresponding subsets in the bulk that were grouped *in silico* using isotype subclass information  
79 and number of mutations. We further demonstrate that sequences with the same isotype  
80 subclass originating from different cell types are closely related, suggesting the presence of  
81 isotype-specific rather than cell-type specific signatures in the IgH repertoire. We finally

82 correlate these signatures to the isotype subclass positioning on the locus and find that  
83 downstream subclasses exhibit enhanced signs of maturity, overall providing new insights into  
84 the selection and the peripheral differentiation of distinct B cell subpopulations.

85

## 86 **Results**

87

### 88 **Physically sorted B cell subpopulations and their corresponding subsets in the bulk share** 89 **similar repertoire characteristics**

90 We compared IgH repertoire characteristics between the following B cell subpopulations:  
91  $B_{naive}$ ,  $B_{MZ}$ ,  $B_{PC\_MD}$ ,  $B_{PC\_AG}$ , and  $B_{switched}$  and their corresponding subsets that we obtained *in*  
92 *silico* from  $B_{bulk}$ :  $B_{bulk\_naive}$ ,  $B_{bulk\_MD}$ , and  $B_{bulk\_switched}$ . We identified three separate clusters: one  
93 made of predominantly  $B_{MZ}$ ,  $B_{bulk\_MD}$  and  $B_{PC\_MD}$ ; another with only  $B_{naive}$  and  $B_{bulk\_naive}$ ; and a  
94 third cluster with predominantly  $B_{bulk\_switched}$ ,  $B_{PC\_AG}$  and  $B_{switched}$  (*Figure 1A*) by combining all  
95 repertoire characteristics in a PCA and applying k-means clustering. To test whether this  
96 clustering pattern was driven by VJ gene usage, CDR3 physiochemical properties or the general  
97 repertoire metrics, we analysed these variables separately. Using V family and J gene usage,  
98 there was a clear separation between naïve and memory cells mostly driven by differences in  
99 V1/3 and J4/6 usage (*Supplementary figure 1*). However, no separation between  $B_{MZ}/B_{PC\_MD}/$   
100  $B_{bulk\_MD}$  and  $B_{switched}/B_{PC\_AG}/B_{bulk\_switched}$  was observed (*Figure 1B*). The CDR3 physiochemical  
101 properties alone created similar clusters as when combined together with the other metrics  
102 (*Figure 1C*). This separation was mostly driven by a lower basic and a higher aromatic content  
103 in addition to a higher gravity index and a lower polarity in  $B_{naive}/B_{bulk\_naive}$  compared to memory  
104 subpopulations (*Supplementary figure 2*). Global repertoire metrics also created a clear  
105 separation between  $B_{naive}/B_{bulk\_naive}$ ,  $B_{switched}/B_{PC\_AG}/B_{bulk\_switched}$  and  $B_{MZ}/B_{PC\_MD}/B_{bulk\_MD}$   
106 subpopulations mostly driven by higher mutation counts, NP length and selection pressure in  
107 the CDR and lower junction length and diversity in  $B_{switched}$  compared to  $B_{naive}$  (*Supplementary*  
108 *figure 3*).

109 In summary, we found that V family and J gene usage, the physiochemical properties of the  
110 CDR3, and global repertoire metrics similarly distinguish between B cell subpopulations:  $B_{naive}$ ,  
111  $B_{MZ}/B_{PC\_MD}$  and  $B_{switched}/B_{PC\_AG}$  were divergent but shared properties with their relative  
112 corresponding subsets in the bulk.

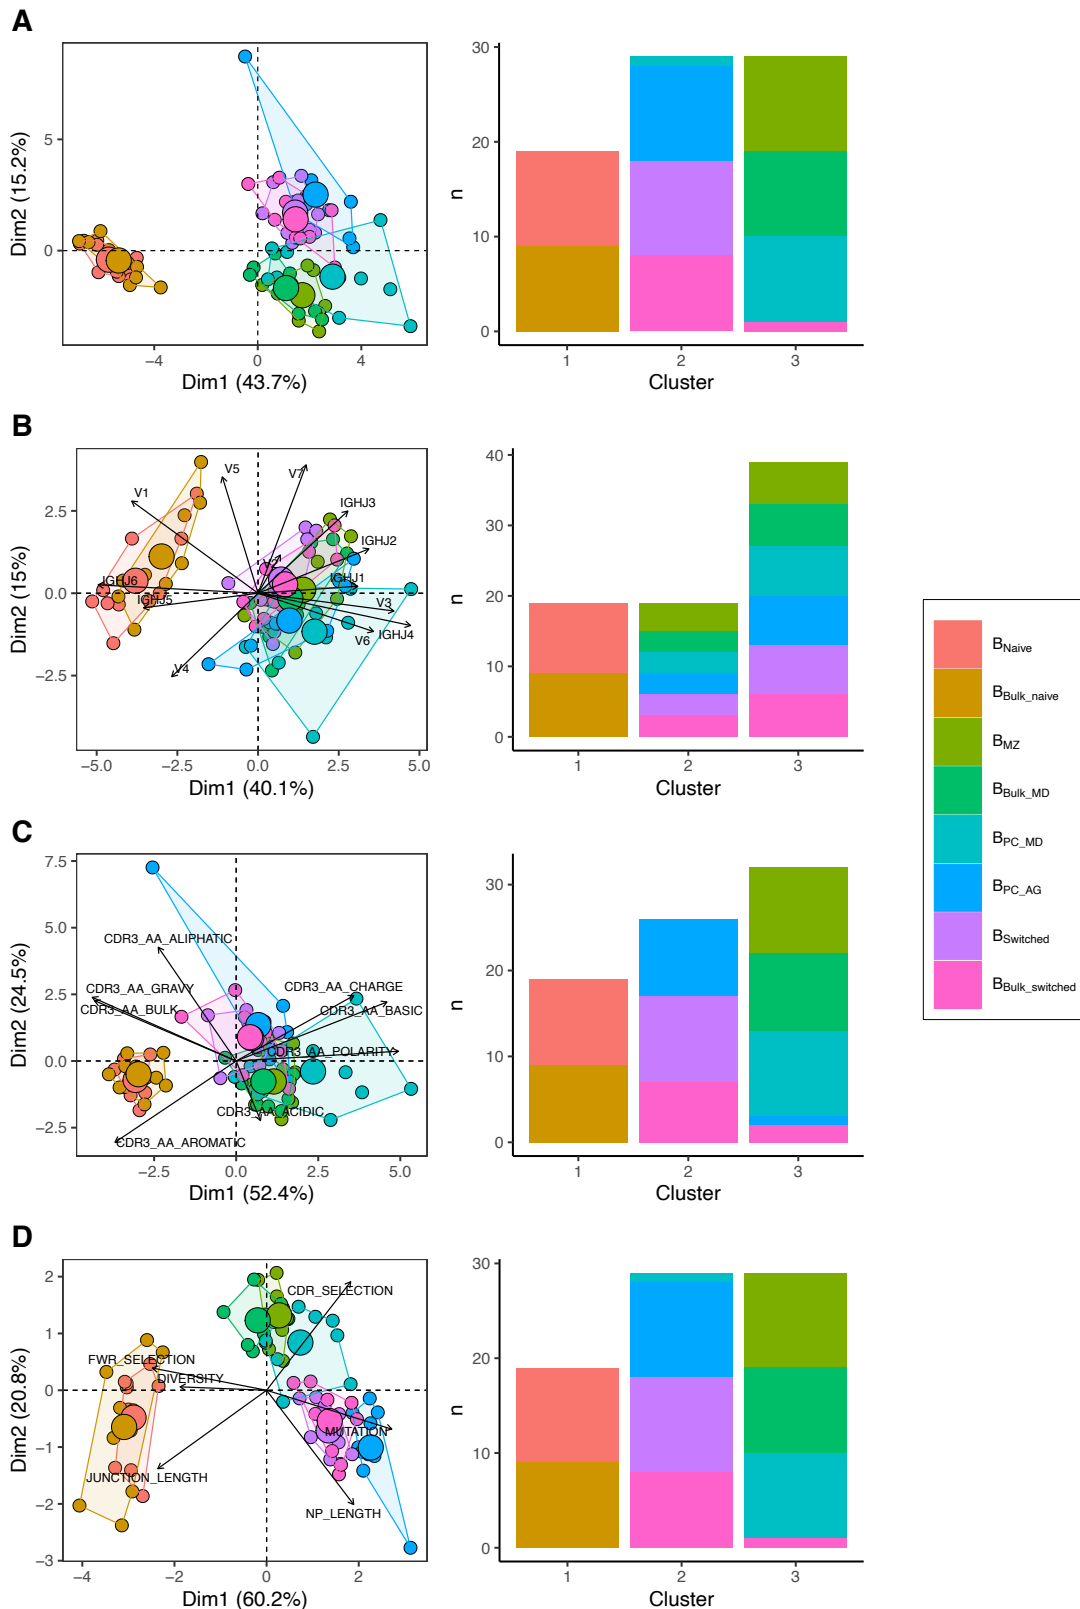

113  
114  
115  
116  
117  
118  
119  
120

**Figure 1: Different repertoire characteristics similarly separate between B cells subpopulations.** PCA (left) and composition of the clusters formed using k-means clustering with k=3 (right) applied on A) all repertoire characteristics, B) V family and J gene usage, C) physiochemical properties of CDR3 junction, D) global repertoire metrics. The percentage of all variation in the data that is explained by PC1 and PC2 is shown on the x and y axis respectively between brackets. In the PCA plots, areas are the convex hulls of the subsets and the largest point of one color represents the center of that hull.

121 **Accurate prediction of cell type based on repertoire features on a single-cell level**

122 We constructed a sequence classifier that predicts the cell type of a sequence using sequence  
123 attributes and different repertoire metrics. Since we subsampled our data making our datasets  
124 perfectly balanced, we used only accuracy as a performance metric. Logistic regression,  
125 decision tree and random forest classifiers all performed satisfactorily (*Figure 2A*). However,  
126 logistic regression performed poorly on correctly classifying  $B_{\text{switched}}$  and  $B_{\text{PC\_AG}}$ , for which  
127 accuracy was almost equal to chance. The performance of all three classifiers was highest in  
128 distinguishing between  $B_{\text{naive}}$  and other cell types.

129 The random forest classifier was the most successful compared to the other two and the most  
130 accurate in predicting the cell type of a sequence. We assessed the relevance of specific  
131 predictors in properly classifying cell types by calculating feature importance scores for each  
132 cell pair (*Figure 2B*). The number of mutations was the highest scoring feature for all cell pairs  
133 except for distinguishing between  $B_{\text{switched}}$  and  $B_{\text{PC\_AG}}$  and between  $B_{\text{MZ}}$  and  $B_{\text{PC\_MD}}$  for which  
134 CDR3 amino acid characteristics had higher scores. Within the CDR3 physiochemical  
135 properties, average bulkiness, average polarity and the gravy hydrophobicity index were the  
136 most differentiating between cell types whereas the basic and acidic content of the CDR3 chain  
137 seemed to be less important. R/S ratio in CDR and FWR and the junction length appeared to  
138 have similar scores and were more important in cases where  $B_{\text{naive}}$  were not one of the two cell  
139 types. V family and J gene appeared to have low importance in distinguishing between all cell  
140 pairs.

141

142

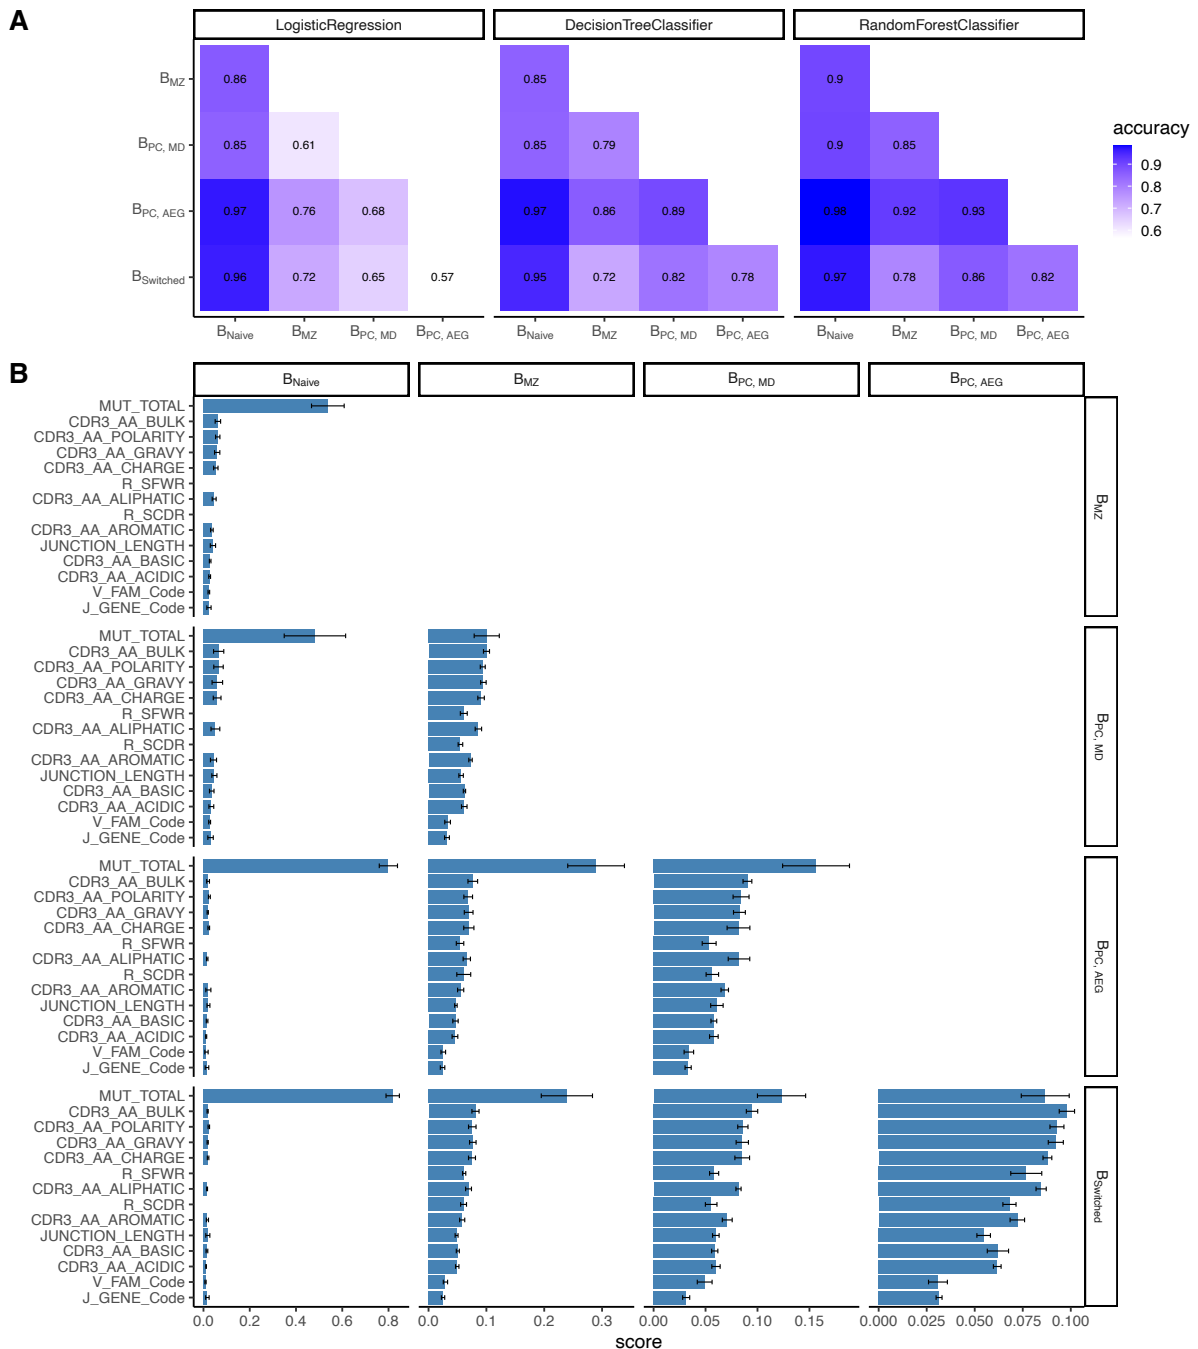

143  
144  
145  
146  
147

**Figure 2: Classification accuracies and feature scores on a single-sequence level. A)** Heatmap showing pairwise classification accuracy results using logistic regression, decision tree and random forest classifier. **B)** Random forest feature scores by cell pair.

148  
149

**Within class switched subsets, sequences with same constant region from different cell types show similar features.**

150  
151  
152  
153  
154  
155  
156  
157

When comparing class-switched transcripts originating from  $B_{\text{bulk\_switched}}$ ,  $B_{\text{switched}}$ , and  $B_{\text{PC\_AG}}$ , isotype subclasses were similarly distributed: IgA1 was the dominant subclass in IgA transcripts whereas IgA2 was less frequently used. All cells showed a dominant use of IgG1 and IgG2 with little IgG3 and negligible IgG4 (*Figure 3A*). Usage of IgA1 in  $B_{\text{PC\_AG}}$  was similar to  $B_{\text{switched}}$  and  $B_{\text{bulk\_switched}}$  ( $p=0.28$  and  $p=0.25$ , Kruskal-Wallis). IgG3 usage was significantly lower in  $B_{\text{PC\_AG}}$  compared to  $B_{\text{bulk\_switched}}$  and  $B_{\text{switched}}$  ( $p=0.01$ ,  $p=0.01$ , Kruskal-Wallis) while IgG1 usage tended to be lower ( $p=0.13$  and  $p=0.11$ , Kruskal-Wallis) and IgG2 usage higher in  $B_{\text{PC\_AG}}$  compared to the other two B cell subpopulations ( $p=0.11$  and  $p=0.11$ , Kruskal-Wallis).



158 When combining repertoire characteristics by isotype subclass and cell type for class-switched  
 159 transcripts resulting from  $B_{\text{bulk\_switched}}$ ,  $B_{\text{switched}}$  and  $B_{\text{PC\_AG}}$ , we found that samples with the same  
 160 constant region originating from different cell types overlapped. (Figure 3B) We identified two  
 161 clusters: one mainly composed of IgG1 and IgG3 samples from all cell types and another with  
 162 IgA1, IgA2 and IgG2 samples by applying k-means clustering with  $k=2$  (Figure 3C). By further  
 163 dividing the data and with increasing  $k$ , we observed that newly formed clusters were mainly  
 164 composed of distinct isotype subclasses, while the cell type itself was not a defining factor for  
 165 cluster formation. Interestingly, we couldn't see a clear separation between IgG2 and IgA2  
 166 samples with increasing number of clusters.  
 167  
 168

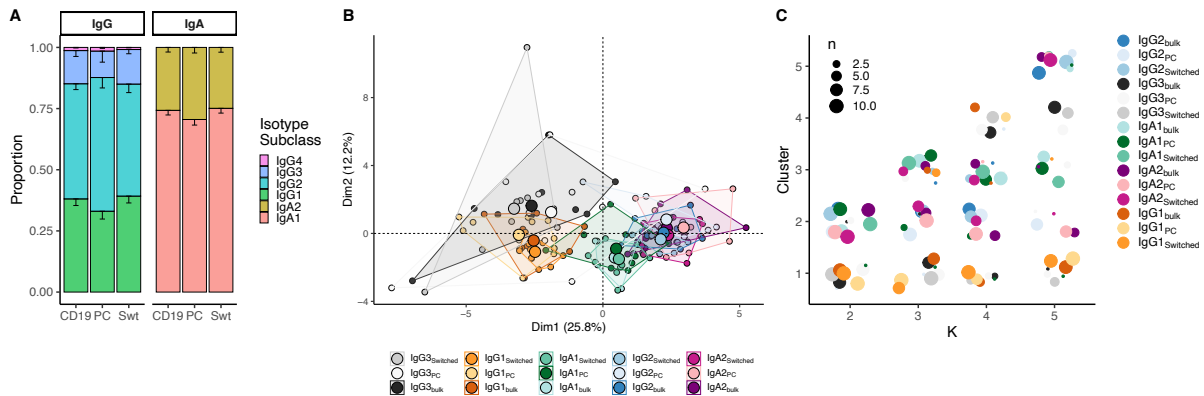

169  
 170 **Figure 3: Analysis of isotype subclasses in IgG and IgA transcripts.** A) Isotype subclass  
 171 distribution by cell type. Error bars represent the standard error of the mean. B) PCA on all  
 172 repertoire properties combined by cell type and isotype subclass. Areas are the convex hulls of  
 173 a group and the largest point of one color represents the center of that hull. C) Composition of  
 174 the clusters formed by applying the k-means clustering algorithm on all data with increasing  $k$   
 175 from  $k=2$  to  $k=5$   
 176

### B cell repertoire metrics correlate with constant region positioning on the IgH locus.

177 The IgH locus contains 9 constant genes: the genes encoding for IgM and IgD are the closest  
 178 to the V-D-J recombination sites while those for IgG3, IgG1 and IgA1 are further downstream  
 179 but still close to IgM/IgD whereas more distant on the locus are the genes that encode for IgG2,  
 180 IgG4, IgE and IgA2 (Figure 4A). We determined and compared B cell repertoire metrics  
 181 between different subclasses in  $B_{\text{PC}}$  and  $B_{\text{switched}}$  and compared those to  $B_{\text{naive}}$  and  $B_{\text{MZ}}$ .  $B_{\text{naive}}$   
 182 showed the lowest number of mutations and R/S ratio and longest CDR3 junction. Memory  
 183 subsets had a high number of mutations, with  $B_{\text{MZ}}$  and  $B_{\text{PC\_MD}}$  having fewer mutations than  
 184 class switched transcripts (Figure 4B). IgM-distal subclasses IgG2 and IgA2 in both  $B_{\text{switched}}$   
 185 and  $B_{\text{PC\_AG}}$  showed the highest R/S ratio indicating high selection pressure (Figure 4C). All  
 186 antigen-experienced subsets had a lower junction length compared to  $B_{\text{naive}}$  except for IgM-  
 187 proximal transcripts IgG3 and IgG1 (Figure 4E). The proportion of IGHV4-34, the gene  
 188 associated with self-reactivity<sup>33</sup>, was lower in memory subsets compared to  $B_{\text{naive}}$  except for  
 189 IgG3 from  $B_{\text{switched}}$  for which the proportion of IGHV4-34 was similar to naïve subsets (Figure  
 190 4F). Within IgG and IgA sequences, genomic distance from IgM correlated with a higher R/S  
 191 ratio, shorter junction and lower usage of IGHV4-34.  $B_{\text{PC}}$  had a significantly lower diversity  
 192 compared to all other cell types (Figure 4G). Interestingly, transcripts from  $B_{\text{switched}}$  showed a  
 193 similar diversity to  $B_{\text{naive}}$  whereas  $B_{\text{MZ}}$  were less diverse. Within  $B_{\text{PC\_AG}}$ , IgM-distal subclasses  
 194 showed a lower diversity.  
 195 IGHV family and IGHJ gene usage also showed a discrepancy between different subsets: IGHV  
 196 family usage in IgM-proximal subclasses IgG3 and IgG1 was similar to  $B_{\text{Naive}}$ .  $B_{\text{MZ}}$  and IgM-  
 197 distal subclasses were enriched in IGHJ4 at the expense of IGHJ6 compared to naïve cells and  
 198



199 IgG1-3 B-cell subsets (*Supplementary figure 4*). To reduce the dimensionality of all data points  
200 into a single one-dimensional axis, we performed LDA fitted on the relative gene frequencies  
201 (*Figure 4H*). This showed a clear distinction between B<sub>naive</sub>, IgG1-3 and B<sub>MZ</sub>, IgG2 and IgA1-  
202 2. An LDA fitted on the physiochemical properties of the CDR3 junction also showed a clear  
203 distinction between naïve and memory subsets, with IgG3 and IgG1 being closest to B<sub>naive</sub> and  
204 IgG2 and IgA2 overlapping and furthest away (*Figure 4I*).  
205

206 In summary, we found that different B cell repertoire metrics correlate with the positioning of  
207 their respective subclass genes on the IgH locus, namely with the increasing genomic distance  
208 from IgM, with the proximal IgH subclasses being more similar to naïve.  
209

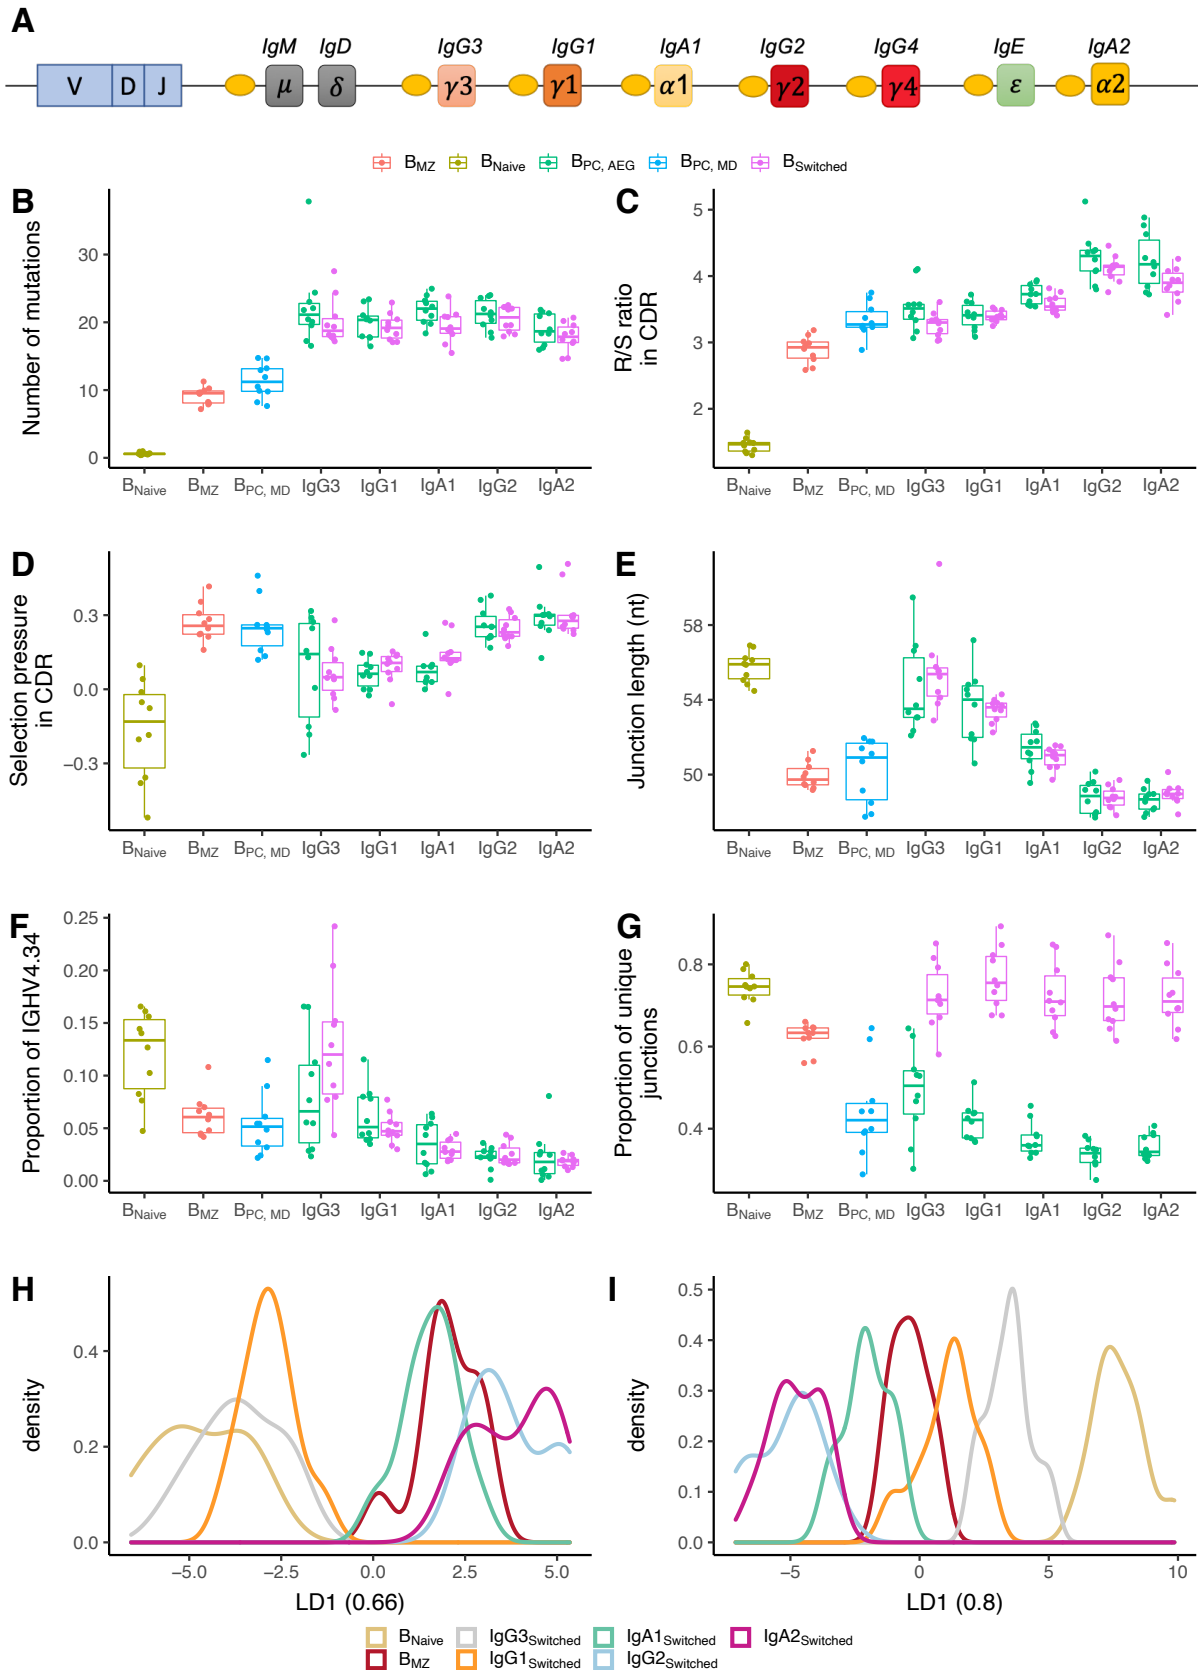

210  
211  
212  
213  
214  
215

**Figure 4: Analysis of repertoire metrics by isotype subclass and cell type.** A) Overview of the IgH constant region locus. Comparison of A) mutation counts, B) R/S ratio, C) selection pressure, D) junction length, F) proportion of IGHV4-34 and G) diversity between different B cell subpopulations. LDA fitted on H) V family and J gene usage and I) CDR3 amino acid physiochemical properties.

## 216 Discussion

217

218 Here, we used AIRR-seq to characterize similarities and differences in the IgH repertoire of  
219 bulk B cells and different sorted naïve and memory B cell populations. This allowed for an in-  
220 depth understanding of the mechanisms underlying B-cell responses. We report differences in  
221 V family and J gene usage, CDR3 physiochemical properties and global repertoire  
222 characteristics that similarly distinguish between naïve, IgM/IgD memory and class switched  
223 subsets both at the repertoire and at the sequence level. Furthermore, we show differences in  
224 the repertoire characteristics at the isotype subclass level unrelated to cell type that correlate  
225 with the position of the constant gene on the IgH locus. This study provides powerful insight  
226 on biological mechanisms underlying the B cell response as well as novel understanding of  
227 AIRR-seq methodologies to be taken into account in future studies.

228

229 Previous work involving human naïve and antigen-experienced B cell repertoires have shown  
230 naïve B cells to have shorter junctions and higher usage of IGHJ6 and IGHV3, and lower usage  
231 of IGHJ4 and IGHV1 compared with IgM memory and switched B cells.<sup>34–37</sup> Differences in  
232 gene usage and CDR3 properties between IgM memory and switched B cells have also been  
233 reported.<sup>20</sup> IgM memory and switched B cells have been found to use more negatively charged  
234 residues and to have less hydrophobic junctions compared with naïve B cells.<sup>18,20</sup> Here, we  
235 focused on a more detailed examination of the repertoires by combining multiple characteristics  
236 using dimensionality reduction methods. Results of a previous study revealed that combining  
237 only a few repertoire characteristics is sufficient to discriminate between B cell  
238 subpopulations.<sup>19</sup> In addition, an LDA combining V gene family proportions has been found to  
239 successfully distinguish between IgM and IgG repertoires.<sup>38</sup> We extend these findings by  
240 showing that using V family and J gene usage, CDR3 physiochemical properties or global  
241 repertoire characteristics similarly allow to separate between naïve and memory  
242 subpopulations. This suggests that distinct B cell subpopulations derive from different  
243 developmental mechanisms and are subject to selective processes that lead to similar variable  
244 gene identity. This can also reflect that different types of B cells are stimulated by different  
245 types of antigens and therefore have distinctive junction compositions and properties.

246

247 Previous research has demonstrated that same B cell subpopulations from different donors are  
248 more similar in their repertoire characteristics than different B cell subpopulations within an  
249 individual.<sup>39,40</sup> This has led to the understanding that differences between naïve and memory  
250 cells are conserved across unrelated individuals. Our findings are in agreement with these  
251 observations, and we extend on those by showing that the main defining factor in repertoire  
252 similarity is the constant region type, namely the isotype subclass, and that differences between  
253 subclasses are conserved across both cell type and individual. This finding suggests the  
254 existence of an isotype-based mechanism for repertoire control that is constant across cell types  
255 and individuals.

256

257 In addition to the comparative analysis of the different peripheral B cell subsets, our study  
258 represents, to our knowledge, the first comparison of bulk B cell sequencing with sorted B cell  
259 subpopulations. We showed that sequencing unsorted B cells from peripheral blood and  
260 combining the constant region information with the degree of SHM to bioinformatically group  
261 transcripts yields accurate results comparable to physical sorting, especially when analysing  
262 global repertoire characteristics. We acknowledge that this might be limiting in tasks sensitive  
263 to potential biases from different RNA levels per cell such as identifying antigen-specific  
264 sequences from plasma cells.

265

266 Recent IgH repertoire studies have moved towards using machine learning and artificial  
267 intelligence in contrast to traditional statistical approaches for goals including vaccine design,  
268 immunodiagnostics and antibody discovery.<sup>41-44</sup> Previous work has focused on representing  
269 repertoires as sequence or subsequence-based features, i.e. overlapping amino acid k-mers and  
270 their Atchley biophysicochemical properties.<sup>41,42</sup> Here, we report a simple pairwise classifier  
271 that successfully predicts the cell type of a sequence based on only the commonly used sequence  
272 attributes such as number of mutations and junction length. Random forest and decision tree  
273 classifiers outperformed the logistic regression algorithm suggesting a non-linear separation  
274 between cell types. A common concern when applying machine learning is the possibility of  
275 over-fitting. To prevent this, we trained the algorithm on 80% of the data and tested its  
276 performance on the remaining unseen 20%. We also subsampled every pair of classes to equal  
277 number of sequences in order to balance the dataset. The model presented here is applied only  
278 within an individual and is thereby confined by repertoire signals that might be individual-  
279 specific. More work improving the generalisability of the model across individuals would be  
280 revolutionizing in terms of its potential practical applications. Unsurprisingly, the number of  
281 mutations was the most important feature in distinguishing between cell types. These results  
282 along with previous work are promising and suggest that increasing the predictive potential of  
283 machine learning methods could help in finding sequence characteristics that distinguish  
284 between groups, such as disease state and healthy.

285  
286 Studies indicate that both direct and sequential CSR to IgM distal isotype subclasses can  
287 occur.<sup>45,46</sup> Several studies have provided evidence for sequential CSR. IgM was found to  
288 commonly switch to proximal subclasses (IgG1, IgA1, and IgG2), but direct switches from IgM  
289 to more downstream subclasses (IgG4, IgE, or IgA2) were rare.<sup>7</sup> It has also been reported that  
290 a deficiency in IgG3, the most IgM-proximal subclass, frequently results in a decrease in other  
291 IgG subclasses.<sup>47</sup> Although it is challenging to determine whether sequential CSR occurs during  
292 a primary response, by re-entry into the germinal center, or during a secondary response to the  
293 same antigen, we and others have shown that IgM-distal subclasses accumulate with age, likely  
294 due to secondary encounter with antigen.<sup>22,48</sup> Studies comparing the mean mutation number  
295 between isotype subclasses have shown contradicting results: in one study, mutations varied in  
296 relation to the constant region position on the IgH locus, with the closest to IgM (IgG3) having  
297 the lowest mutations,<sup>23</sup> while in another study, no such difference was observed.<sup>24</sup> We didn't  
298 find a difference in number of mutations among IgG subclasses. Our findings rather suggest  
299 that mutation is more efficient in more downstream subclasses as we found that these exhibit  
300 higher R/S ratios and selection pressure in the CDR, consistent with previous studies.<sup>49</sup>  
301 Generally, IgM distal subclasses showed signs of maturity (shorter junctions, lower IGHV4-34  
302 usage) while transcripts from IgM proximal subclasses were more similar to those of naïve B  
303 cells. These results suggest that sequential CSR subjects B cells to selective forces leading to  
304 more mature variable gene properties without necessarily accumulating more mutations.

305  
306 In summary, in this study we took an extensive look at the IgH repertoire of different flow  
307 cytometry sorted as well as bioinformatically grouped cell types and isotype subclasses of  
308 healthy individuals. Using advanced bioinformatic tools, statistical analysis and machine  
309 learning, this analysis provides deep insight into the different mechanisms of B cell  
310 development and boosts our understanding of the B cell system components in health.

311  
312

## 313 **Material and methods**

314

### 315 **1. Sample collection and cell sorting**

316 Buffy coat samples were obtained from 10 anonymous healthy adults, hence no approval from  
317 the local ethics committee was necessary. B cells were first isolated by magnetic cell sorting  
318 using the human CD19 MicroBeads (Miltenyi Biotec, San Diego, CA) and the AutoMACS  
319 magnetic cell separator. From 9 out of the 10 samples,  $3 \times 10^6$  bulk CD19<sup>+</sup> B cells ( $B_{\text{bulk}}$ ) were  
320 lysed and stored at -80C. The remaining cells were sorted by flow cytometry into 4  
321 subpopulations using cell surface markers characteristic for naïve ( $B_{\text{naive}}$ ), marginal zone ( $B_{\text{MZ}}$ ),  
322 plasma cells ( $B_{\text{PC}}$ ), and switched memory B cells ( $B_{\text{switched}}$ ). Cells were then lysed and stored at  
323 -80C. Surface markers, demographics, number of cells and purity of each sample are outlined  
324 in *supplementary table 1*.

325

### 326 **2. RNA extraction and library preparation**

327 RNA extraction was performed on the lysate using the RNeasy Mini Kit (Qiagen, Hilden,  
328 Germany). Libraries were prepared as previously described.<sup>22</sup> Briefly, two reverse transcription  
329 (RT) reactions were carried out for each RNA sample resulting from  $B_{\text{bulk}}$  or  $B_{\text{PC}}$ : one with  
330 equal concentrations of IgM and IgD specific primers and another with IgA, IgG, and IgE  
331 specific primers. Only one RT reaction with IgM and IgD specific primers was performed on  
332  $B_{\text{naive}}$  and  $B_{\text{MZ}}$  samples; similarly, we applied one RT reaction with IgA, IgG and IgE primers  
333 on samples obtained from  $B_{\text{switched}}$ . IgH cDNA rearrangements were then amplified in a two-  
334 round multiplex PCR using a mix of IGHV region forward primers and Illumina adapter  
335 primers, followed by gel extraction for purification and size selection. The final concentration  
336 of PCR products was measured using Qubit prior to library preparation and combined with a  
337 total of 12 equally concentrated samples. Final libraries barcoded with individual i7 and i5  
338 adapters were sequenced in each run on the Illumina MiSeq platform (2x300bp protocol).

339

### 340 **3. Data preprocessing**

341 Preprocessing of raw sequences was carried out using the Immcantation toolkit and as per  
342 Ghraichy et al 2020.<sup>22,25,26</sup> Briefly, samples were demultiplexed based on their Illumina tags. A  
343 quality filter was applied, paired reads were joined and then collapsed according to their unique  
344 molecular identifier (UMI). Identical reads with different UMI were further collapsed resulting  
345 in a dataset of unique sequences. VDJ gene assignment was carried out using IgBlast.<sup>27</sup> Isotype  
346 subclass annotation was carried out by mapping constant regions to germline sequences using  
347 stampy.<sup>28</sup> The number and type of V gene mutations was determined as the number of  
348 mismatches with the germline sequence using the R package shazam.<sup>26</sup> The R package  
349 alakazam was also used to calculate the physicochemical properties of the CDR3 amino acid  
350 sequences.<sup>26</sup> Selection pressure was calculated using BASELINE and the statistical framework  
351 used to test for selection was  $\text{CDR\_R}/(\text{CDR\_R} + \text{CDR\_S})$ <sup>29</sup>.

352

### 353 **4. In silico grouping of sequences**

354 For  $B_{\text{bulk}}$  samples, we used the constant region information combined with the mutation counts  
355 to classify individual sequences into different subsets: IgD and IgM sequences with up to 2 nt  
356 mutations across the entire V gene were considered “unmutated” ( $B_{\text{bulk\_naive}}$ ) to account for  
357 remaining PCR and sequencing bias. The remaining mutated IgD and IgM sequences were  
358 labelled as IgD/IgM memory ( $B_{\text{bulk\_MD}}$ ). All class-switched sequences were defined as antigen-  
359 experienced regardless of their V gene mutation count ( $B_{\text{bulk\_switched}}$ ). We split the sequences  
360 originating from  $B_{\text{PC}}$  into two categories: IgM/IgD  $B_{\text{PC}}$  ( $B_{\text{PC\_MD}}$ ) and switched IgG/IgA PCs  
361 ( $B_{\text{PC\_AG}}$ ) according to the constant region of the sequences.

362

363

## 364 **5. Summarising repertoire characteristics**

365 V family and J gene usage was calculated in proportions for each individual and cell type. We  
366 summarised the mean of the following CDR3 physiochemical characteristics: hydrophobicity,  
367 bulkiness, polarity, normalized aliphatic index, normalized net charge, acidic side chain residue  
368 content, basic side chain residue content, aromatic side chain content by individual and cell  
369 type.

370 Mean junction length, number of mutations, and numbers of non-template (N) and palindromic  
371 (P) nucleotide added at the junction were calculated by individual and cell type. Selection  
372 pressure was summarised separately in complementarity-determining region (CDR) and  
373 framework region (FWR). Diversity was calculated as the proportion of unique junctions out  
374 of total transcripts. The preceding characteristics are referred to as global repertoire metrics.  
375

## 376 **6. Dimensionality reduction and clustering**

377 Principal component analysis (PCA) and k-means clustering were applied to the different  
378 repertoire characteristics to explore and find associations in the data. They were applied using  
379 the internal R functions `prcomp()` and `kmeans()`.<sup>30</sup> Linear discriminant analysis (LDA) was  
380 performed using the R function `lda()` from the package MASS<sup>31</sup>.

381

## 382 **7. Sequence classifier**

383 We constructed the sequence classifier using the sklearn package in python<sup>32</sup>. Because we have  
384 the constant region information and to avoid error accumulation, we performed a pairwise  
385 classification thereby transforming the multiclass problem into a binary classification. Within  
386 every participant and for every pair of cells, we subsampled to the lower sequence number to  
387 avoid bias and dataset imbalance. We used the number of mutations, the physiochemical  
388 properties, and the junction length as numerical input features. The V gene family and J gene  
389 were one-hot encoded. In the case where the naïve cells were not one of the two classes, the  
390 replacement/silent (R/S) mutation ratios in CDR and FWR were included as features. We split  
391 the data into training and testing set using the default test size of 0.2. We used logistic  
392 regression, decision tree, and random forest classifiers for prediction. The accuracy was  
393 recorded to judge the overall performance of the models. For every pair of classes, the mean  
394 accuracy of the 10 samples was calculated.  
395

## 396 **8. Data Availability**

397 Raw data used in this study are available at the NCBI Sequencing Read Archive  
398 ([www.ncbi.nlm.nih.gov/sra](http://www.ncbi.nlm.nih.gov/sra)) under BioProject number PRJNA748239 including metadata  
399 meeting MiAIRR standards (32). The processed dataset is available in Zenodo  
400 (<https://doi.org/10.5281/zenodo.3585046>) along with the protocol describing the exact  
401 processing steps with the software tools and version numbers.  
402

403

404

## 404 **Competing interests**

405 None of the authors have declared any conflict of interest related to this work.



406 **References**

- 407 1. Lefranc, M.-P. & Lefranc, G. *The immunoglobulin factsbook*. Academic Press (2001).
- 408 2. Tonegawa, S. Somatic generation of antibody diversity. *Nature* **302**, 575–581 (1983).
- 409 3. Jolly, C. J. *et al.* The targeting of somatic hypermutation. *Semin. Immunol.* (1996).
- 410 doi:10.1006/smim.1996.0020
- 411 4. Zheng, N. Y., Wilson, K., Jared, M. & Wilson, P. C. Intricate targeting of
- 412 immunoglobulin somatic hypermutation maximizes the efficiency of affinity
- 413 maturation. *J. Exp. Med.* (2005). doi:10.1084/jem.20042483
- 414 5. Stavnezer, J., Guikema, J. E. J. & Schrader, C. E. Mechanism and Regulation of Class
- 415 Switch Recombination. *Annu. Rev. Immunol.* (2008).
- 416 doi:10.1146/annurev.immunol.26.021607.090248
- 417 6. Vidarsson, G., Dekkers, G. & Rispen, T. IgG subclasses and allotypes: From structure
- 418 to effector functions. *Front. Immunol.* **5**, 520 (2014).
- 419 7. Horns, F. *et al.* Lineage tracing of human B cells reveals the in vivo landscape of
- 420 human antibody class switching. *Elife* (2016). doi:10.7554/elife.16578
- 421 8. Cameron, L. *et al.* S $\epsilon$ S $\mu$  and S $\epsilon$ S $\gamma$  Switch Circles in Human Nasal Mucosa Following Ex
- 422 Vivo Allergen Challenge: Evidence for Direct as Well as Sequential Class Switch
- 423 Recombination. *J. Immunol.* (2003). doi:10.4049/jimmunol.171.7.3816
- 424 9. Zhang, K., Mills, F. C. & Saxon, A. Switch circles from IL-4-directed  $\epsilon$  class switching
- 425 from human B lymphocytes: Evidence for direct, sequential, and multiple step
- 426 sequential switch from  $\mu$  to  $\epsilon$  Ig heavy chain gene. *J. Immunol.* (1994).
- 427 10. Allman, D. & Pillai, S. Peripheral B cell subsets. *Current Opinion in Immunology* (2008).
- 428 doi:10.1016/j.coi.2008.03.014
- 429 11. Leandro, M. J. B-cell subpopulations in humans and their differential susceptibility to
- 430 depletion with anti-CD20 monoclonal antibodies. *Arthritis Research and Therapy*
- 431 (2013). doi:10.1186/ar3908
- 432 12. Mandric, I. *et al.* Profiling immunoglobulin repertoires across multiple human tissues
- 433 using RNA sequencing. *Nat. Commun.* (2020). doi:10.1038/s41467-020-16857-7
- 434 13. Ghraichy, M., Galson, J. D., Kelly, D. F. & Trück, J. B-cell receptor repertoire sequencing
- 435 in patients with primary immunodeficiency: a review. 1–16 (2017).
- 436 doi:10.1111/imm.12865
- 437 14. Galson, J. D., Pollard, A. J., Trück, J. & Kelly, D. F. Studying the antibody repertoire
- 438 after vaccination: Practical applications. *Trends in Immunology* **35**, 319–331 (2014).
- 439 15. Lindau, P. & Robins, H. S. Advances and applications of immune receptor sequencing
- 440 in systems immunology. *Curr. Opin. Syst. Biol.* **1**, 62–68 (2017).
- 441 16. Georgiou, G. *et al.* The promise and challenge of high-throughput sequencing of the
- 442 antibody repertoire. *Nature Biotechnology* **32**, 158–168 (2014).
- 443 17. Berkowska, M. A. *et al.* Human memory B cells originate from three distinct germinal
- 444 center-dependent and -independent maturation pathways. *Blood* (2011).
- 445 doi:10.1182/blood-2011-04-345579
- 446 18. Mroczek, E. S. *et al.* Differences in the composition of the human antibody repertoire
- 447 by b cell subsets in the blood. *Front. Immunol.* (2014). doi:10.3389/fimmu.2014.00096
- 448 19. Galson, J. D. *et al.* BCR repertoire sequencing: Different patterns of B-cell activation
- 449 after two Meningococcal vaccines. *Immunol. Cell Biol.* **93**, 885–895 (2015).
- 450 20. Wu, Y. C. *et al.* High-throughput immunoglobulin repertoire analysis distinguishes
- 451 between human IgM memory and switched memory B-cell populations. *Blood* (2010).
- 452 doi:10.1182/blood-2010-03-275859
- 453 21. Glanville, J. *et al.* Naive antibody gene-segment frequencies are heritable and



- 454 unaltered by chronic lymphocyte ablation. *Proc. Natl. Acad. Sci.* **108**, 20066–20071  
455 (2011).
- 456 22. Ghraichy, M. *et al.* Maturation of the Human Immunoglobulin Heavy Chain Repertoire  
457 With Age. *Front. Immunol.* (2020). doi:10.3389/fimmu.2020.01734
- 458 23. Jackson, K. J. L., Wang, Y. & Collins, A. M. Human immunoglobulin classes and  
459 subclasses show variability in VDJ gene mutation levels. *Immunol. Cell Biol.* (2014).  
460 doi:10.1038/icb.2014.44
- 461 24. Kitaura, K. *et al.* Different somatic hypermutation levels among antibody subclasses  
462 disclosed by a new next-generation sequencing-based antibody repertoire analysis.  
463 *Front. Immunol.* (2017). doi:10.3389/fimmu.2017.00389
- 464 25. Vander Heiden, J. A. *et al.* PRESTO: A toolkit for processing high-throughput  
465 sequencing raw reads of lymphocyte receptor repertoires. *Bioinformatics* **30**, 1930–  
466 1932 (2014).
- 467 26. Gupta, N. T. *et al.* Change-O: A toolkit for analyzing large-scale B cell immunoglobulin  
468 repertoire sequencing data. *Bioinformatics* **31**, 3356–3358 (2015).
- 469 27. Ye, J., Ma, N., Madden, T. L. & Ostell, J. M. IgBLAST: an immunoglobulin variable  
470 domain sequence analysis tool. *Nucleic Acids Res.* **41**, W34–W40 (2013).
- 471 28. Lunter, G. & Goodson, M. Stampy: A statistical algorithm for sensitive and fast  
472 mapping of Illumina sequence reads. *Genome Res.* **21**, 936–939 (2011).
- 473 29. Yaari, G., Uduman, M. & Kleinstein, S. H. Quantifying selection in high-throughput  
474 Immunoglobulin sequencing data sets. *Nucleic Acids Res.* **40**, e134–e134 (2012).
- 475 30. 3.5.1., R. D. C. T. A Language and Environment for Statistical Computing. *R Foundation*  
476 *for Statistical Computing* **2**, <https://www.R-project.org> (2018).
- 477 31. Venables, W. N. & Ripley, B. D. *Modern Applied Statistics with S* (fourth.). New York:  
478 Springer. Retrieved from <http://www.stats.ox.ac.uk/pub/MASS4> (2002).
- 479 32. Pedregosa, F. *et al.* Scikit-learn: Machine Learning in Python. *J. Mach. Learn. Res.*  
480 (2015).
- 481 33. Bashford-Rogers, R. J. M., Smith, K. G. C. & Thomas, D. C. Antibody repertoire analysis  
482 in polygenic autoimmune diseases. *Immunology* **155**, 3–17 (2018).
- 483 34. Briney, B. S., Willis, J. R., Hicar, M. D., Thomas, J. W. & Crowe, J. E. Frequency and  
484 genetic characterization of V(DD)J recombinants in the human peripheral blood  
485 antibody repertoire. *Immunology* (2012). doi:10.1111/j.1365-2567.2012.03605.x
- 486 35. Larimore, K., McCormick, M. W., Robins, H. S. & Greenberg, P. D. Shaping of Human  
487 Germline IgH Repertoires Revealed by Deep Sequencing. *J. Immunol.* **189**, 3221–3230  
488 (2012).
- 489 36. DeWitt, W. S. *et al.* A public database of memory and naive B-cell receptor sequences.  
490 *PLoS One* (2016). doi:10.1371/journal.pone.0160853
- 491 37. Bautista, D. *et al.* Differential Expression of IgM and IgD Discriminates Two  
492 Subpopulations of Human Circulating IgM+IgD+CD27+ B Cells That Differ  
493 Phenotypically, Functionally, and Genetically. *Front. Immunol.* (2020).  
494 doi:10.3389/fimmu.2020.00736
- 495 38. Friedensohn, S. *et al.* Synthetic standards combined with error and bias correction  
496 improve the accuracy and quantitative resolution of antibody repertoire sequencing  
497 in human naïve and memory B cells. *Front. Immunol.* (2018).  
498 doi:10.3389/fimmu.2018.01401
- 499 39. Briney, B. S., Willis, J. R., McKinney, B. A. & Crowe, J. E. High-throughput antibody  
500 sequencing reveals genetic evidence of global regulation of the naive and memory  
501 repertoires that extends across individuals. *Genes Immun.* (2012).

- 502 doi:10.1038/gene.2012.20  
503 40. Rubelt, F. *et al.* Individual heritable differences result in unique cell lymphocyte  
504 receptor repertoires of naïve and antigen-experienced cells. *Nat. Commun.* (2016).  
505 doi:10.1038/ncomms11112  
506 41. Greiff, V. *et al.* Learning the High-Dimensional Immunogenomic Features That Predict  
507 Public and Private Antibody Repertoires. *J. Immunol.* (2017).  
508 doi:10.4049/jimmunol.1700594  
509 42. Ostmeyer, J. *et al.* Statistical classifiers for diagnosing disease from immune  
510 repertoires: A case study using multiple sclerosis. *BMC Bioinformatics* (2017).  
511 doi:10.1186/s12859-017-1814-6  
512 43. Konishi, H. *et al.* Capturing the differences between humoral immunity in the normal  
513 and tumor environments from repertoire-seq of B-cell receptors using supervised  
514 machine learning. *BMC Bioinformatics* (2019). doi:10.1186/s12859-019-2853-y  
515 44. Shemesh, O., Polak, P., Lundin, K. E. A., Sollid, L. M. & Yaari, G. Machine Learning  
516 Analysis of Naïve B-Cell Receptor Repertoires Stratifies Celiac Disease Patients and  
517 Controls. *Front. Immunol.* (2021). doi:10.3389/fimmu.2021.627813  
518 45. Wesemann, D. R. *et al.* Immature B cells preferentially switch to IgE with increased  
519 direct  $\text{S}\mu$  to  $\text{S}\epsilon$  recombination. *J. Exp. Med.* (2011). doi:10.1084/jem.20111155  
520 46. Looney, T. J. *et al.* Human B-cell isotype switching origins of IgE. *J. Allergy Clin.*  
521 *Immunol.* (2016). doi:10.1016/j.jaci.2015.07.014  
522 47. Meyts, I., Bossuyt, X., Proesmans, M. & De, B. Isolated IgG3 deficiency in children: To  
523 treat or not to treat? Case presentation and review of the literature. *Pediatric Allergy*  
524 *and Immunology* (2006). doi:10.1111/j.1399-3038.2006.00454.x  
525 48. IJspeert, H. *et al.* Evaluation of the Antigen-Experienced B-Cell Receptor Repertoire in  
526 Healthy Children and Adults. *Front. Immunol.* **7**, 410 (2016).  
527 49. De Jong, B. G. *et al.* Human IgG2- and IgG4-expressing memory B cells display  
528 enhanced molecular and phenotypic signs of maturity and accumulate with age.  
529 *Immunol. Cell Biol.* (2017). doi:10.1038/icb.2017.43  
530

531 **Supplementary material**

532

533 **Supplementary table 1:**

| Participant ID | Cells | Age | Sex | B cell number | Purity |
|----------------|-------|-----|-----|---------------|--------|
| Co C.081.1 BC  | MZB   | 50  | M   | 250000        | 93.6   |
| Co C.081.1 BC  | Naive | 50  | M   | 250000        | 96.7   |
| Co C.080.1 BC  | MZB   | NA  | M   | 250000        | NA     |
| Co C.080.1 BC  | Naive | NA  | M   | 250000        | NA     |
| Co C.082.1 BC  | Naive | 40  | M   | 250000        | 97.6   |
| Co C.083.1 BC  | MZB   | 18  | M   | 250000        | 82.9   |
| Co C.083.1 BC  | Naive | 18  | M   | 250000        | 98.2   |
| Co C.084.1 BC  | MZB   | 36  | F   | 250000        | 86.4   |
| Co C.084.1 BC  | Naive | 36  | F   | 250000        | 96.7   |
| Co C.081.1 BC  | Swt   | 50  | M   | 250000        | 98.8   |
| Co C.080.1 BC  | Swt   | NA  |     | 250000        | NA     |
| Co C.080.1 BC  | PC    | NA  |     | 55000         | NA     |
| Co C.081.1 BC  | PC    | 50  | M   | 1.00E+05      | 45.8   |
| Co C.082.1 BC  | MZB   | 40  | M   | 250000        | 81.5   |
| Co C.082.1 BC  | Swt   | 40  | M   | 250000        | 98.7   |
| Co C.082.1 BC  | PC    | 40  | M   | 19000         | 67.8   |
| Co C.083.1 BC  | Swt   | 18  | M   | 250000        | 99.2   |
| Co C.083.1 BC  | PC    | 18  | M   | 21000         | 32.8   |
| Co C.081.1 BC  | CD19  | 50  | M   | 5.00E+05      | NA     |
| Co C.084.1 BC  | Swt   | 36  | F   | 250000        | 98.2   |
| Co C.084.1 BC  | PC    | 36  | F   | 15000         | 30.3   |
| Co C.084.1 BC  | CD19  | 36  | F   | 5.00E+05      | NA     |
| Co C.085.1 BC  | CD19  | 41  | M   | 5.00E+05      | NA     |
| Co C.085.1 BC  | PC    | 41  | M   | 21000         | 32.2   |
| Co C.085.1 BC  | Swt   | 41  | M   | 250000        | 97.5   |
| Co C.085.1 BC  | Naive | 41  | M   | 250000        | 98.9   |
| Co C.085.1 BC  | MZB   | 41  | M   | 250000        | 92.1   |
| Co BC7 BC      | Naive | 49  | F   | 250000        | 93.6   |
| Co BC8 BC      | MZB   | 59  | F   | 250000        | 90.5   |
| Co BC8 BC      | Naive | 59  | F   | 250000        | 95.2   |
| Co BC9 BC      | MZB   | 44  | F   | 250000        | 91.8   |
| Co BC9 BC      | Naive | 44  | F   | 250000        | 99.2   |
| Co BC10 BC     | MZB   | 51  | F   | 250000        | 94.2   |
| Co BC10 BC     | Naive | 51  | F   | 250000        | 96.2   |
| Co BC7 BC      | CD19  | 49  | F   | 5.00E+05      | NA     |
| Co BC7 BC      | Swt   | 49  | F   | 250000        | 95.6   |
| Co BC7 BC      | PC    | 49  | F   | 14000         | 37     |
| Co BC8 BC      | CD19  | 59  | F   | 5.00E+05      | NA     |
| Co BC8 BC      | Swt   | 59  | F   | 250000        | 97.3   |
| Co BC8 BC      | PC    | 59  | F   | 24000         | 68.2   |
| Co BC9 BC      | CD19  | 44  | F   | 5.00E+05      | NA     |
| Co BC9 BC      | Swt   | 44  | F   | 250000        | 94.5   |
| Co BC9 BC      | PC    | 44  | F   | 22000         | 82.8   |
| Co BC10 BC     | CD19  | 51  | F   | 5.00E+05      | NA     |
| Co BC10 BC     | Swt   | 51  | F   | 250000        | 99.1   |
| Co BC10 BC     | PC    | 51  | F   | 19000         | 60     |
| Co C.082.1 BC  | CD19  | 40  | M   | 5.00E+05      | NA     |
| Co BC7 BC      | MZB   | 49  | F   | 250000        | 86.7   |
| Co C.083.1 BC  | CD19  | 18  | M   | 5.00E+05      | NA     |

534

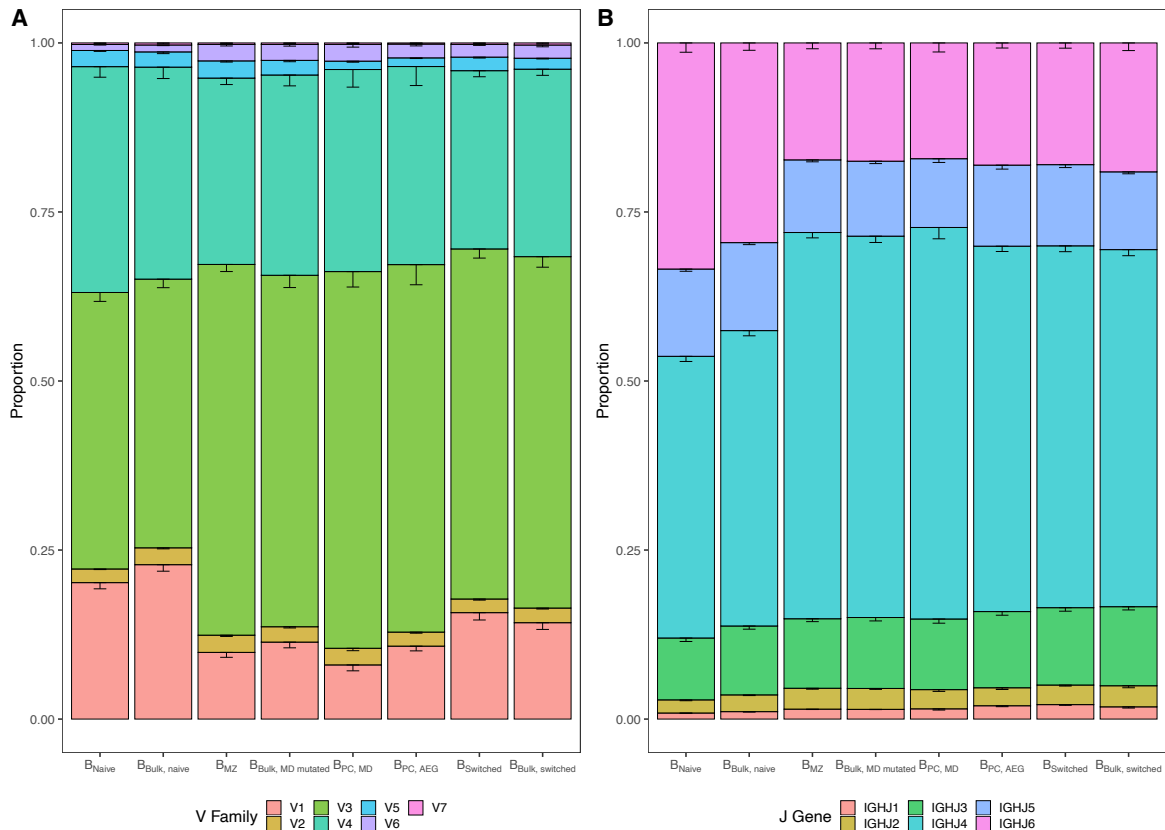

535  
536  
537  
538  
539

**Supplementary figure 1** A) V family and B) J gene usage by B cell subpopulation. Bar plots indicate the proportion of sequences with a certain gene. Error bars represent the standard error of the mean.

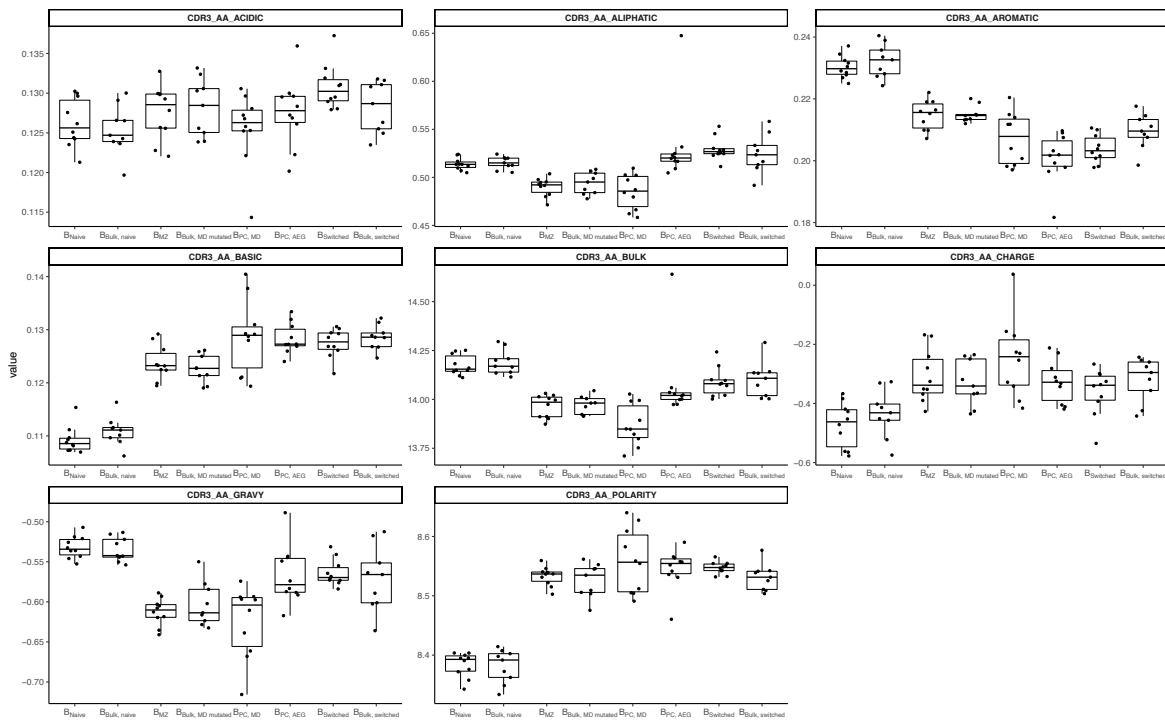

540  
541  
542

**Supplementary figure 2** : Comparison of CDR3 amino acid physiochemical properties in different B cell subpopulations.

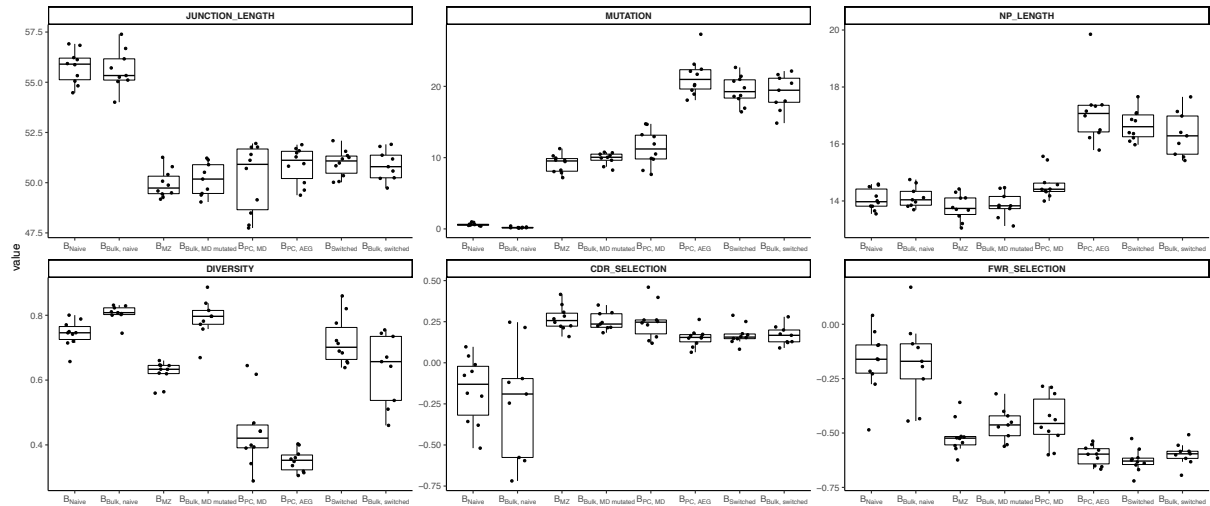

543  
544 **Supplementary figure 3** : Comparison of global repertoire metrics in different B cell  
545 subpopulations.  
546

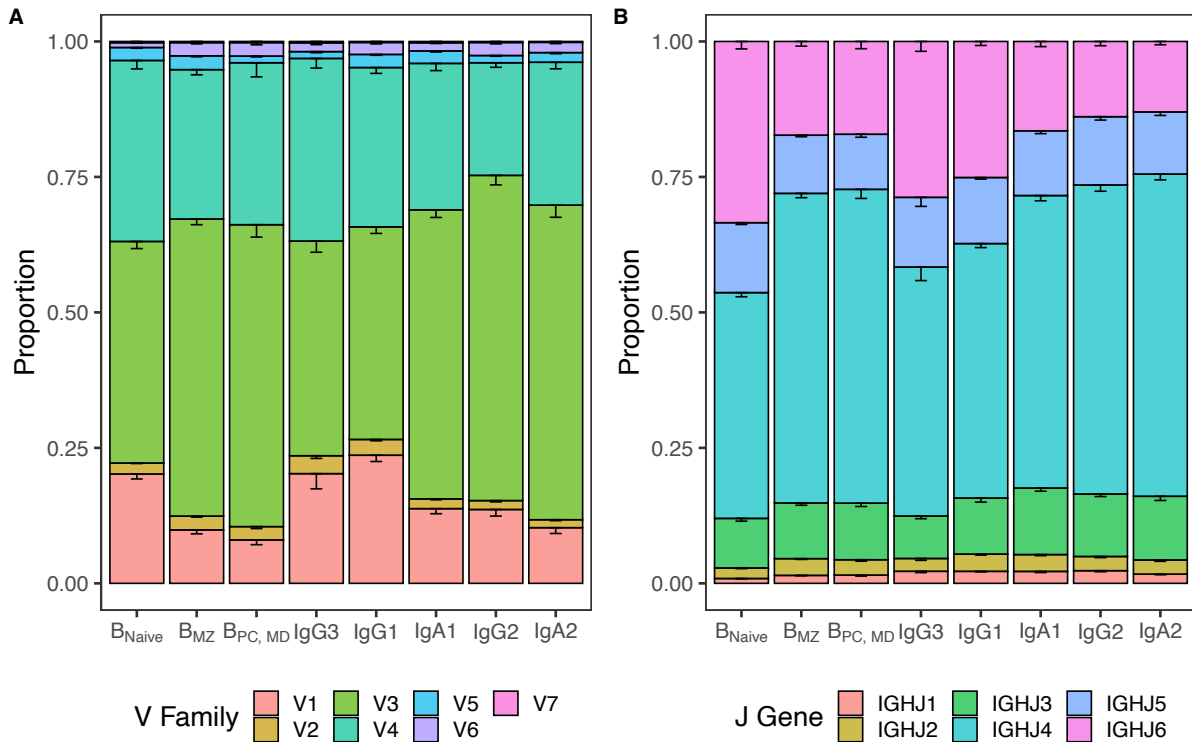

547  
548 **Supplementary figure 4:** A) V family and B) J gene usage in different B cell subpopulations  
549 and isotype subclasses. Bar plots indicate the proportion of sequences with a certain gene. Error  
550 bars represent the standard error of the mean.
